# Supplementary material for: Zinc disrupts central carbon metabolism and capsule biosynthesis in Streptococcus pyogenes
Source: PubMed Central journal article supplement (PMC4450579; doi:10.1038/srep10799), 2015-06-01
Supplement: srep10799-s1.pdf [file srep10799-s1.pdf]

1  
2  
3  
4  
5  
6  
7  
8  
9  
10  
11  
12  
13  
14  
15  
16  
17  
18  
19  
20  
21  
22  
23  
24  
25

**Zinc disrupts central carbon metabolism and capsule biosynthesis in *Streptococcus pyogenes***

Cheryl-lynn Y. Ong<sup>1</sup>, Mark J. Walker<sup>1,#</sup> and Alastair G. McEwan<sup>1,#</sup>

<sup>1</sup>School of Chemistry and Molecular Biosciences and Australian Infectious Diseases Research Centre, The University of Queensland, St. Lucia 4072, Australia.

**#Contributed equally to this work**

**For correspondence:**

Professor Alastair McEwan, School of Chemistry and Molecular Biosciences, The University of Queensland, Cooper Road, St Lucia, QLD, 4072, Australia. Tel: 0061-7-3365-3477; Fax: 0061-7-3346-0512; E-mail: [mcewan@uq.edu.au](mailto:mcewan@uq.edu.au).

Key words: zinc, group A streptococcus, *Streptococcus pyogenes*, glycolysis, capsule, tagatose-6-phosphate pathway

26 **Supplementary Information:**

27

28 **Supplementary Tables S1-S2**

29 **Supplementary Figures S1-S5**

30

31

32

33

34

35

36

37

38

39

40

41

42

43

44

45

46

47

48

49

50

52 **Table S1** Table of genes regulated by zinc, organized by gene number

| Locus                      | Gene/Locus     | Function                                      | <i>gczA+</i> /<br>$\Delta$ <i>gczA</i> | P-<br>Value | q-<br>Value |
|----------------------------|----------------|-----------------------------------------------|----------------------------------------|-------------|-------------|
| <i>Upregulated by zinc</i> |                |                                               |                                        |             |             |
| M5005_Spy_0083             | <i>rpoB</i>    | DNA-directed RNA polymerase beta chain        | 2.290                                  | 0.001       | 0.050       |
| M5005_Spy_0084             | <i>rpoC</i>    | DNA-directed RNA polymerase beta' chain       | 2.337                                  | 0.001       | 0.048       |
| M5005_Spy_0087             | <i>comYB</i>   | ComG operon protein 2                         | 2.052                                  | 0.003       | 0.109       |
| M5005_Spy_0088             | <i>comYC</i>   | ComG operon protein 3                         | 2.278                                  | 0.002       | 0.085       |
| M5005_Spy_0089             | <i>Spy0089</i> | ComG operon protein 4                         | 2.267                                  | 0.001       | 0.059       |
| M5005_Spy_0090             | <i>Spy0090</i> | Hypothetical protein                          | 2.266                                  | 0.001       | 0.060       |
| M5005_Spy_0091             | <i>comYD</i>   | ComG operon protein 6                         | 2.573                                  | 0.000       | 0.028       |
| M5005_Spy_0092             | <i>Spy0092</i> | ComG operon protein 6                         | 2.381                                  | 0.001       | 0.047       |
| M5005_Spy_0102             | <i>Spy0102</i> | Single-strand DNA binding protein             | 2.853                                  | 0.002       | 0.085       |
| M5005_Spy_0151             | <i>Spy0151</i> | 3-keto-L-gulonate-6-phosphate decarboxylase   | 2.028                                  | 0.004       | 0.123       |
| M5005_Spy_0153             | <i>araD</i>    | L-ribulose-5-phosphate 4-epimerase            | 2.067                                  | 0.004       | 0.123       |
| M5005_Spy_0157             | <i>opuAA</i>   | Glycine betaine transport ATP-binding protein | 3.577                                  | 0.000       | 0.034       |
| M5005_Spy_0158             | <i>opuABC</i>  | Glycine betaine transport system permease     | 3.361                                  | 0.001       | 0.048       |
| M5005_Spy_0245             | <i>nifU</i>    | IscU protein                                  | 2.106                                  | 0.003       | 0.118       |
| M5005_Spy_0246             | <i>Spy0246</i> | ABC transporter-associated protein            | 2.145                                  | 0.003       | 0.110       |
| M5005_Spy_0473             | <i>Spy0473</i> | Multidrug resistance protein B                | 2.079                                  | 0.004       | 0.140       |
| M5005_Spy_0653             | <i>czcD</i>    | Cobalt zinc cadmium resistance protein        | 28.799                                 | 0.000       | 0.005       |
| M5005_Spy_0875             | <i>Spy0875</i> | Sortase                                       | 3.047                                  | 0.002       | 0.073       |
| M5005_Spy_0990             | <i>dnaE</i>    | DNA polymerase III alpha subunit              | 2.707                                  | 0.004       | 0.128       |
| M5005_Spy_1021             | <i>Spy1021</i> | Phage protein                                 | 2.597                                  | 0.003       | 0.112       |
| M5005_Spy_1022             | <i>Spy1022</i> | Portal protein                                | 3.147                                  | 0.000       | 0.031       |
| M5005_Spy_1472             | <i>hit</i>     | Bis(5'-nucleosyl)-tetraphosphatase            | 2.032                                  | 0.003       | 0.110       |
| M5005_Spy_1629             | <i>salX</i>    | Lantibiotic transport ATP-binding protein     | 2.677                                  | 0.000       | 0.029       |
| M5005_Spy_1630             | <i>salB</i>    | Serine (threonine) dehydratase                | 2.701                                  | 0.001       | 0.048       |
| M5005_Spy_1631             | <i>salA</i>    | Lantibiotic salivaricin A                     | 2.238                                  | 0.002       | 0.090       |
| M5005_Spy_1632             | <i>lacG</i>    | 6-phospho-beta-galactosidase                  | 2.459                                  | 0.001       | 0.052       |
| M5005_Spy_1633             | <i>lacE</i>    | PTS system, lactose-specific IIBC component   | 2.792                                  | 0.000       | 0.028       |
| M5005_Spy_1634             | <i>lacF</i>    | PTS system, lactose-specific IIA component    | 2.754                                  | 0.000       | 0.031       |
| M5005_Spy_1635             | <i>lacD.2</i>  | Tagatose-bisphosphate aldolase                | 2.609                                  | 0.000       | 0.030       |
| M5005_Spy_1636             | <i>lacC.2</i>  | Tagatose-6-phosphate kinase                   | 2.570                                  | 0.000       | 0.034       |
| M5005_Spy_1637             | <i>lacB.2</i>  | Galactose-6-phosphate isomerase lacB subunit  | 2.700                                  | 0.000       | 0.030       |
| M5005_Spy_1638             | <i>lacA.2</i>  | Galactose-6-phosphate isomerase lacA subunit  | 2.331                                  | 0.001       | 0.048       |
| M5005_Spy_1639             | <i>lacR.2</i>  | Lactose phosphotransferase system repressor   | 2.016                                  | 0.003       | 0.119       |
| M5005_Spy_1640             | <i>Spy1640</i> | DNA-damage-inducible protein J                | 2.115                                  | 0.003       | 0.120       |
| M5005_Spy_1641             | <i>Spy1641</i> | Hypothetical cytosolic protein                | 2.380                                  | 0.001       | 0.060       |
| M5005_Spy_1642             | <i>Spy1642</i> | DNA integration/recombination/inversion       | 2.313                                  | 0.003       | 0.119       |
| M5005_Spy_1643             | <i>Spy1643</i> | DNA integration/recombination/inversion       | 2.379                                  | 0.001       | 0.047       |
| M5005_Spy_1644             | <i>Spy1644</i> | Hypothetical protein                          | 3.024                                  | 0.000       | 0.034       |

|                              |                |                                                   |        |       |       |
|------------------------------|----------------|---------------------------------------------------|--------|-------|-------|
| M5005_Spy_1646               | <i>rpsI</i>    | SSU ribosomal protein S9P                         | 3.467  | 0.001 | 0.051 |
| M5005_Spy_1647               | <i>rplM</i>    | LSU ribosomal protein L13P                        | 2.471  | 0.001 | 0.069 |
| M5005_Spy_1648               | <i>Spy1648</i> | Transcriptional regulator, Cro/CI family          | 2.373  | 0.001 | 0.049 |
| M5005_Spy_1649               | <i>Spy1649</i> | Hypothetical membrane spanning protein            | 2.317  | 0.001 | 0.050 |
| M5005_Spy_1670               | <i>Spy1670</i> | Oxidoreductase                                    | 3.826  | 0.000 | 0.015 |
| M5005_Spy_1671               | <i>Spy1671</i> | Transcriptional regulator, MarR family            | 2.773  | 0.000 | 0.012 |
| M5005_Spy_1807               | <i>argR2</i>   | Arginine repressor                                | 5.380  | 0.000 | 0.028 |
| M5005_Spy_1808               | <i>argS</i>    | Arginyl-tRNA synthetase                           | 2.492  | 0.001 | 0.049 |
| M5005_Spy_1810               | <i>Spy1810</i> | Hypothetical membrane spanning protein            | 2.557  | 0.001 | 0.048 |
| M5005_Spy_1811               | <i>Spy1811</i> | Hypothetical membrane spanning protein            | 2.546  | 0.001 | 0.048 |
| M5005_Spy_1812               | <i>Spy1812</i> | Hypothetical membrane spanning protein            | 3.042  | 0.000 | 0.028 |
| M5005_Spy_1813               | <i>aspS</i>    | Aspartyl-tRNA synthetase                          | 3.720  | 0.000 | 0.013 |
| M5005_Spy_1814               | <i>hisS</i>    | Histidyl-tRNA synthetase                          | 3.154  | 0.000 | 0.029 |
| M5005_Spy_1815               | <i>rpmF</i>    | LSU ribosomal protein L32P                        | 4.444  | 0.000 | 0.010 |
| M5005_Spy_1816               | <i>rpmG</i>    | LSU ribosomal protein L33P                        | 3.685  | 0.000 | 0.017 |
| M5005_Spy_1817               | <i>cadD</i>    | Cadmium resistance protein                        | 3.603  | 0.000 | 0.015 |
| M5005_Spy_1818               | <i>cadC</i>    | Cadmium efflux system accessory protein           | 3.162  | 0.000 | 0.031 |
| M5005_Spy_1819               | <i>Spy1819</i> | Hypothetical phage protein                        | 3.036  | 0.001 | 0.053 |
| <i>Downregulated by zinc</i> |                |                                                   |        |       |       |
| M5005_Spy_0350               | <i>Spy0350</i> | Hypothetical protein                              | -3.484 | 0.000 | 0.013 |
| M5005_Spy_0351               | <i>spyA</i>    | C3 family ADP-ribosyltransferase                  | -2.353 | 0.001 | 0.201 |
| M5005_Spy_0437               | <i>vicX</i>    | Zinc-dependent hydrolase                          | -2.045 | 0.001 | 0.175 |
| M5005_Spy_0534               | <i>Spy0534</i> | (R,R)-butanediol dehydrogenase                    | -2.045 | 0.004 | 0.312 |
| M5005_Spy_0582               | <i>atpC</i>    | ATP synthase epsilon chain                        | -2.169 | 0.004 | 0.332 |
| M5005_Spy_0583               | <i>Spy0583</i> | Hypothetical membrane associated protein          | -2.300 | 0.003 | 0.317 |
| M5005_Spy_0584               | <i>murA</i>    | UDP-N-acetylglucosamine-1-carboxyvinyltransferase | -2.439 | 0.002 | 0.229 |
| M5005_Spy_0585               | <i>epuA</i>    | EpuA protein                                      | -2.469 | 0.001 | 0.146 |
| M5005_Spy_0586               | <i>endA</i>    | DNA-entry nuclease                                | -2.336 | 0.001 | 0.125 |
| M5005_Spy_0885               | <i>Spy0885</i> | DNA topoisomerase I                               | -6.060 | 0.000 | 0.000 |
| M5005_Spy_0886               | <i>Spy0886</i> | Transcriptional regulator, LysR family            | -3.690 | 0.000 | 0.005 |
| M5005_Spy_1034               | <i>Spy1034</i> | Phage protein                                     | -3.021 | 0.000 | 0.032 |
| M5005_Spy_1036               | <i>ssb</i>     | Phage single-strand DNA binding protein           | -2.353 | 0.000 | 0.117 |
| M5005_Spy_1276               | <i>Spy1276</i> | Transcription regulator, crp family               | -3.300 | 0.000 | 0.013 |
| M5005_Spy_1293               | <i>Spy1293</i> | Hypothetical protein                              | -2.667 | 0.001 | 0.116 |
| M5005_Spy_1358               | <i>nadE</i>    | Nicotinate phosphoribosyltransferase              | -2.203 | 0.004 | 0.322 |
| M5005_Spy_1678               | <i>Spy1678</i> | Thioredoxin                                       | -2.119 | 0.003 | 0.333 |

54

55

56

57

58

59

60 **Table S2** List of primers used in this study

| Primer                       | Gene / Function                                | Sequence (5'-3')     |
|------------------------------|------------------------------------------------|----------------------|
| <i>Gene expression study</i> |                                                |                      |
| gyrA-F                       | <i>gyrA</i> / housekeeping                     | GAAGTGATCCCTGGACCTGA |
| gyrA-R                       |                                                | CCCGACCTGTTTGAGTTGTT |
| adh2-F                       | <i>adh2</i> / alcohol dehydrogenase            | GCTATCCGCGTCATCTGGAA |
| adh2-R                       |                                                | ACCAACTGCGTTACGTCCAT |
| adhA-F                       | <i>adhA</i> / acetaldehyde dehydrogenase       | ATTGGTCATGGTGAAGCGCT |
| adhA-R                       |                                                | TGACCAAAATCGCCATGTGC |
| pgmA-F                       | <i>pgmA</i> / phosphoglucomutase               | TGCTTTTGAGTCTGCACAGG |
| pgmA-R                       |                                                | AGAGTTCCTGGTGTGGACGA |
| gapN-F                       | <i>gapN</i> / glyceraldehyde-3-P dehydrogenase | CAACGTTGGCCTGAGTAACC |
| gapN-R                       |                                                | CTTGGCGGTAAGGATTCTGC |
| pfk-F                        | <i>pfk</i> / phosphofructokinase               | TGGCCAAGATTTGTCACACG |
| pfk-R                        |                                                | GCTGAAGGTGTTATGAGCGG |

61

62

63

64

65

66

67

68

69

70

71

72

73

74

75

76

77

78

79

Supplementary Figures

Supplementary Figure 1.

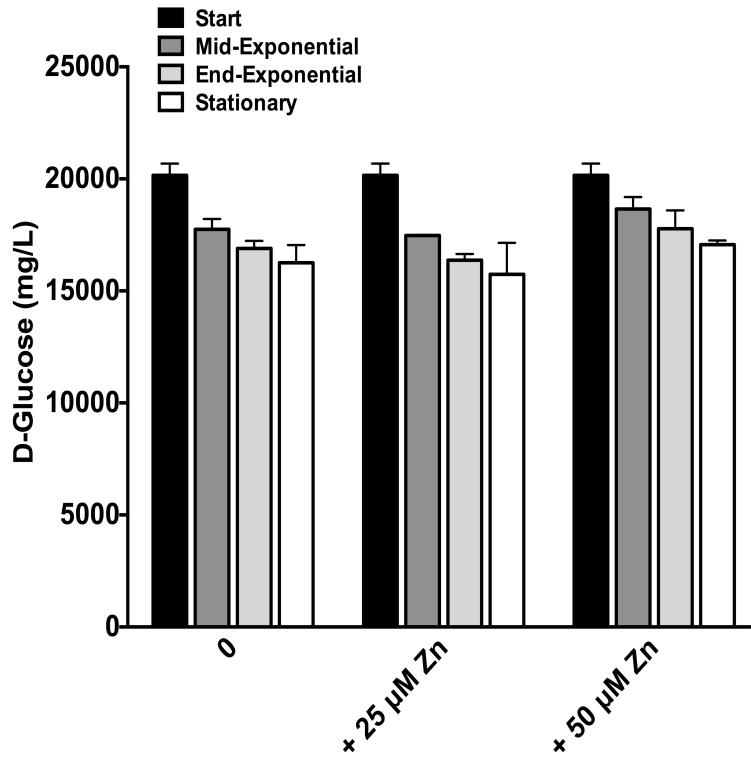

Supplementary Figure 1 Total D-glucose measurement of cells grown in BHP-glucose in the presence and absence of 25 and 50 μM zinc. Supernatant was collected, filtered and measured for D-glucose at different stages of growth. Graph is a representative of three independent experiments.

97 **Supplementary Figure 2.**

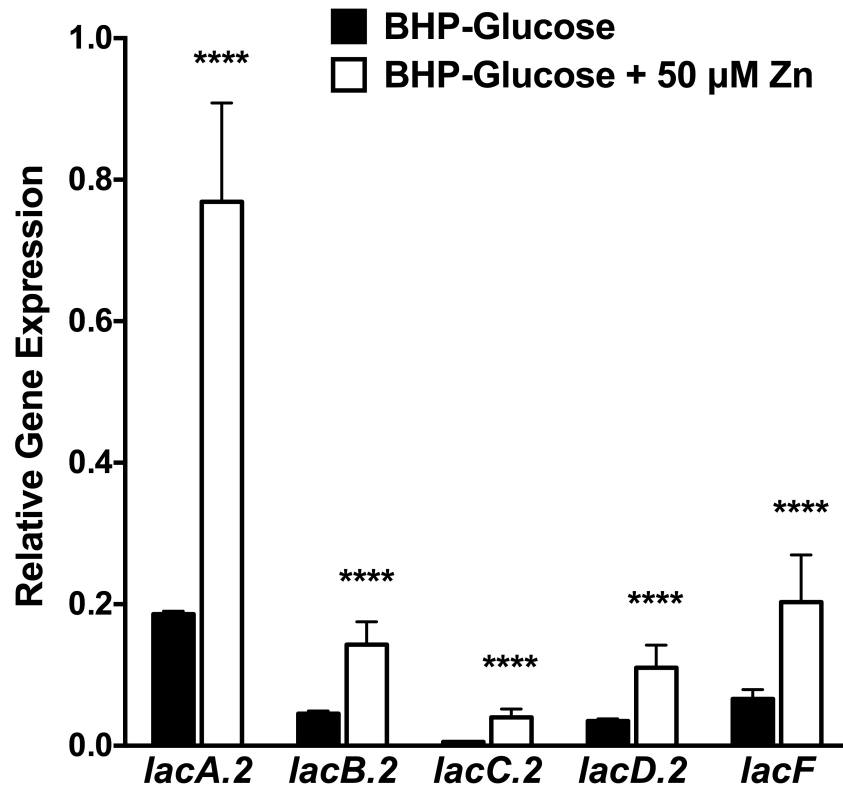

98  
 99 **Supplementary Figure 2** Relative gene expression of the tagatose-6-phosphate metabolism  
 100 genes, *lacF* (encodes D-galactose phosphotransferase), *lacD.2* (encodes tagatose-6-phosphate  
 101 aldolase), *lacC.2* (encodes tagatose-6-phosphate kinase), *lacB.2* and *lacA.2* (encodes galactose-6-  
 102 phosphate isomerase A/B subunits). Cells were grown up to mid-exponential phase in BHP-  
 103 glucose in the presence and absence of 50  $\mu$ M zinc, error bars are indicative of the standard deviation  
 104 of 3 independent experiments. Relative gene expression was calculated using the  $2^{-\Delta\text{CT}}$  method, with  
 105 *proS* as the reference gene. Unpaired, 2-tailed *t* test was performed between relative gene expression  
 106 of cells grown in BHP-glucose in the absence and presence of 50  $\mu$ M zinc; \*\*\*\* $P$ <0.0001.

107

108

109

110

111

112 **Supplementary Figure 3.**

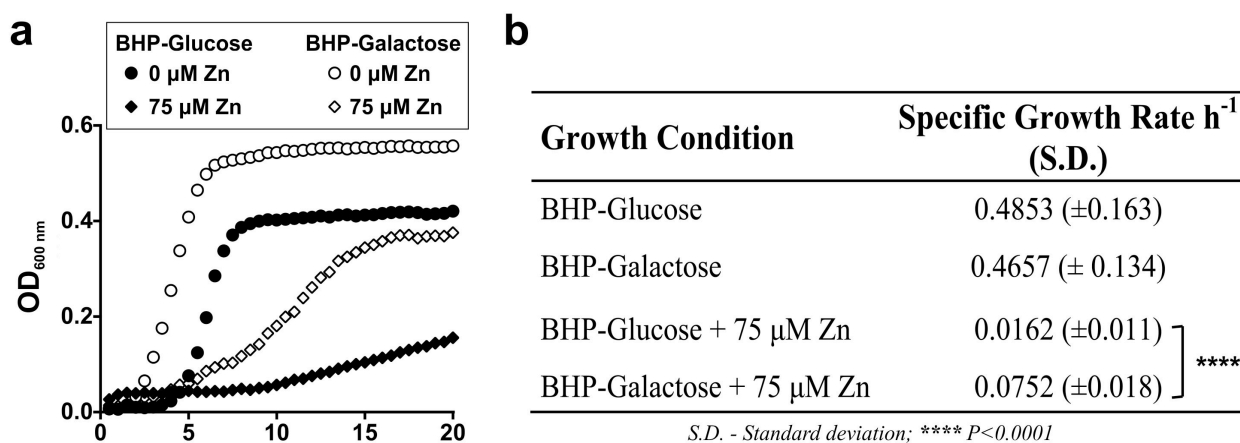

113

114

115

116

**Supplementary Figure 3 Growth curve and specific growth rate analysis of Group A**

***Streptococcus* grown in BHP-glucose, or BHP-galactose in the absence and presence of zinc. (a)**

Growth curve analysis in the absence and presence of 75 μM zinc. Graph is a representative of five

independent experiments. **(b)** Table of the specific growth rates (h<sup>-1</sup>) of GAS cells grown in the

absence and presence of 75 μM zinc. Values shown are the mean specific growth rates of five

independent experiments. Unpaired, 2-tailed *t* test was performed between growth rate of cells grown

in BHP-glucose in the presence of 75 μM zinc and cells grown in BHP-galactose in the presence of

75 μM; \*\*\*\*P<0.0001.

124

125

126

127

128

129

130

131

132



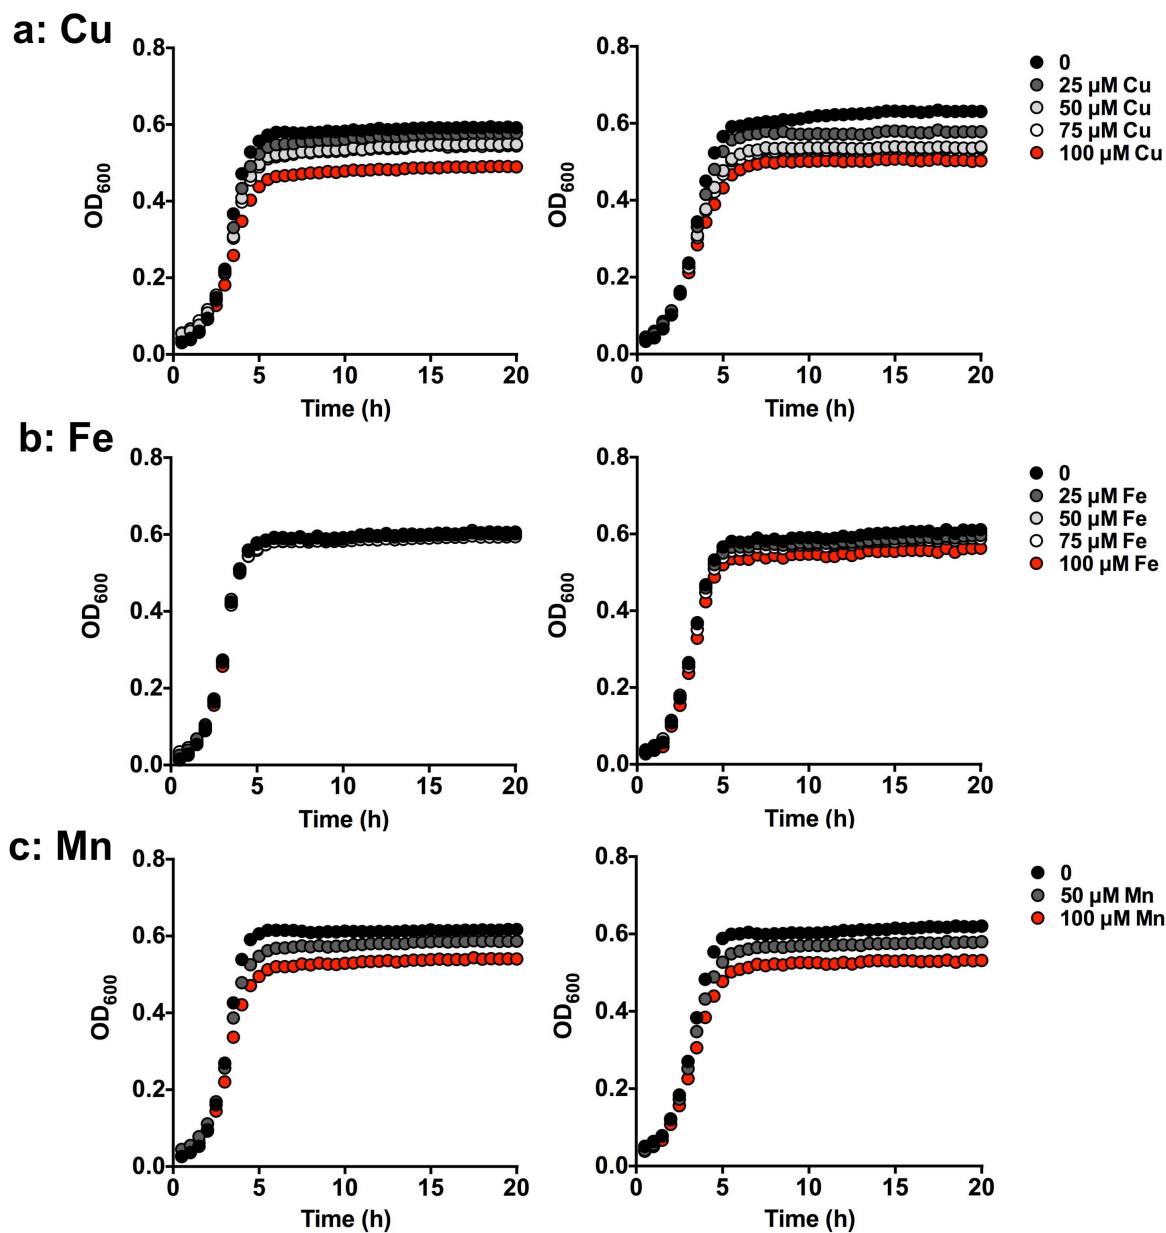

134

135

136

137

Supplementary Figure 4 Growth curve analysis of Group A *Streptococcus* grown in BHP-

138 glucose, or BHP-galactose in the absence and presence of divalent metal ions. (a) copper, (b)

139 iron and, (c) manganese. Graph is a representative of three independent experiments.

140

141

142

143 **Supplementary Figure 5.**

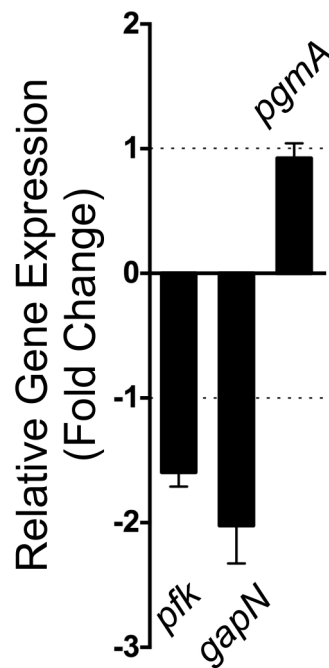

144  
145  
146 **Supplementary Figure 5** Relative gene expression of the glycolytic genes, *pfk* (encodes  
147 **phosphofructokinase**), *gapN* (encodes **glyceraldehyde-3-phosphate dehydrogenase**) and *pgmA*  
148 **(encodes phosphoglucomutase)**. Cells were grown up to mid-exponential phase in BHP-glucose in  
149 the presence and absence of 50  $\mu$ M zinc, error bars are indicative of the standard deviation of 3  
150 independent experiments. Relative gene expression was calculated using the  $2^{-\Delta\text{CT}}$  method, with *gyrA*  
151 as the reference gene, and results are represented as fold change of expression from growth in zinc  
152 compared to growth without zinc.

153  
154  
155
